# Supplementary material for: A multitechnique study of europium decatungstate and human serum albumin molecular interaction
Source: Royal Society of Chemistry journal article supplement (doi:10.1039/b919952g), 2009-12-10
Supplement: b919952g.pdf [file b919952g.pdf]

Supporting information

## A Multitechnique Study of Europium Decatungstate and Human Serum Albumin Molecular Interaction

Li Zheng,<sup>a, d</sup> Ying Ma,<sup>a</sup> Guangjin Zhang,<sup>\*b</sup> Jiannian Yao,<sup>\*a</sup> Bineta Keita<sup>\*c</sup> and Louis Nadjo<sup>c</sup>

### 1 Possible binding site of EuW10 on HSA

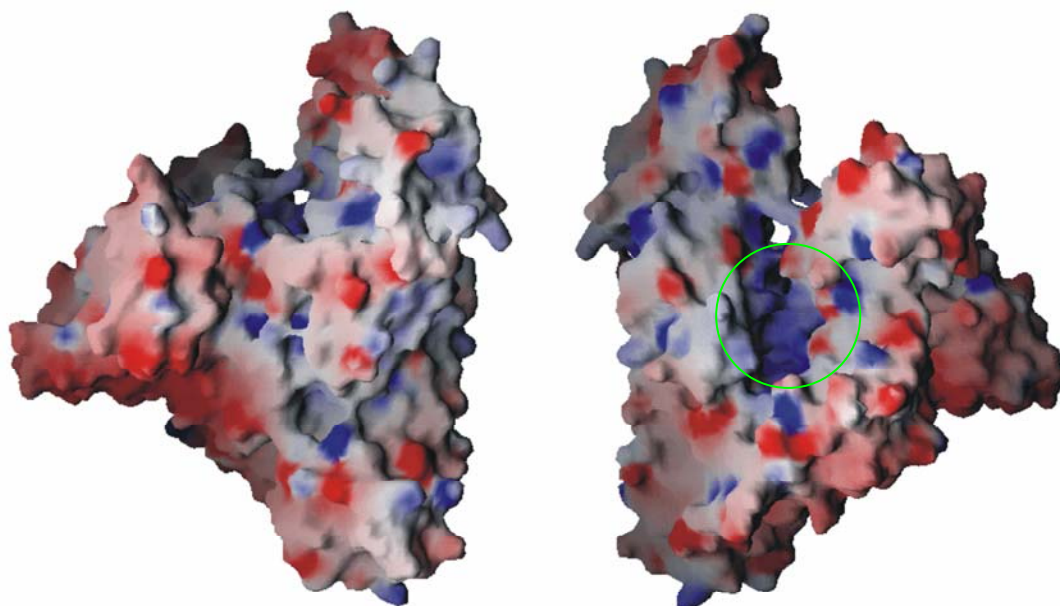

**Fig. S1.** Surface potential of HSA calculated with the GRASP software. The protein is in its N conformation. The two views are related by a 180° rotation about the vertical axis of the sheet. The region in the green circle is the most likely unique for  $[\text{H}_2\text{W}_{12}\text{O}_{40}]^{6-}$  or EuW10 (Blue for positively and red for negatively charged areas) Adapted from reference 4.

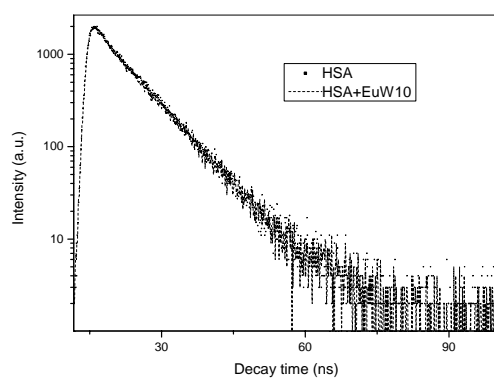

**Fig.S2** The fluorescence decay of HSA in the absence (dots) and the presence (dash) of EuW10. The protein was excited at 295 nm and monitored at 354 nm. The concentration of HSA is  $1 \times 10^{-5}$  M, the concentration of the POM in the dashed curve is  $1 \times 10^{-5}$  M.

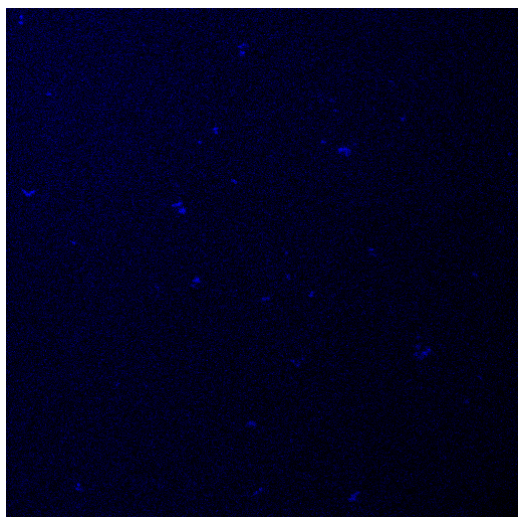

(a)

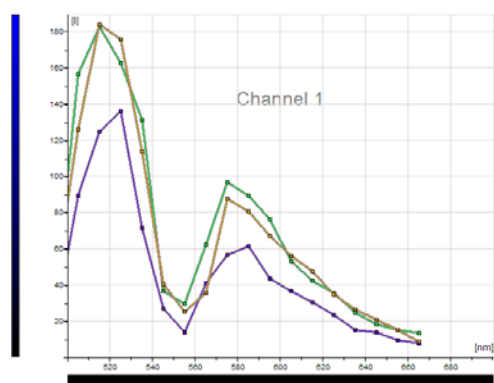

(b)

Fig.S3 a) the luminescence image of the HSA- EuW10 complex. B) the in-situ luminescence spectrum of the area
